# Supplementary material for: p31-43 Gliadin Peptide Forms Oligomers and Induces NLRP3 Inflammasome/Caspase 1- Dependent Mucosal Damage in Small Intestine
Source: PubMed Central journal article supplement (PMC6363691; doi:10.3389/fimmu.2019.00031), 2019-01-30
Supplement: Data_Sheet_1.pdf [file Data_Sheet_1.pdf]

## Supplementary Material

### p31-43 gliadin peptide forms oligomers and induces NLRP3 inflammasome/ caspase 1-dependent mucosal damage in small intestine

María Florencia Gómez Castro<sup>1</sup>, Emanuel Miculán<sup>1</sup>, María Georgina Herrera<sup>2</sup>, Carolina Ruera<sup>1</sup>, Federico Perez<sup>1</sup>, Eduardo Daniel Prieto<sup>3</sup>, Exequiel Barrera<sup>4</sup>, Sergio Pantano<sup>4</sup>, Paula Carasi<sup>1</sup> and Fernando Gabriel Chirido<sup>1,\*</sup>

\*Correspondence: Fernando Gabriel Chirido - [fcirido@biol.unlp.edu.ar](mailto:fcirido@biol.unlp.edu.ar)

#### Supplementary figures

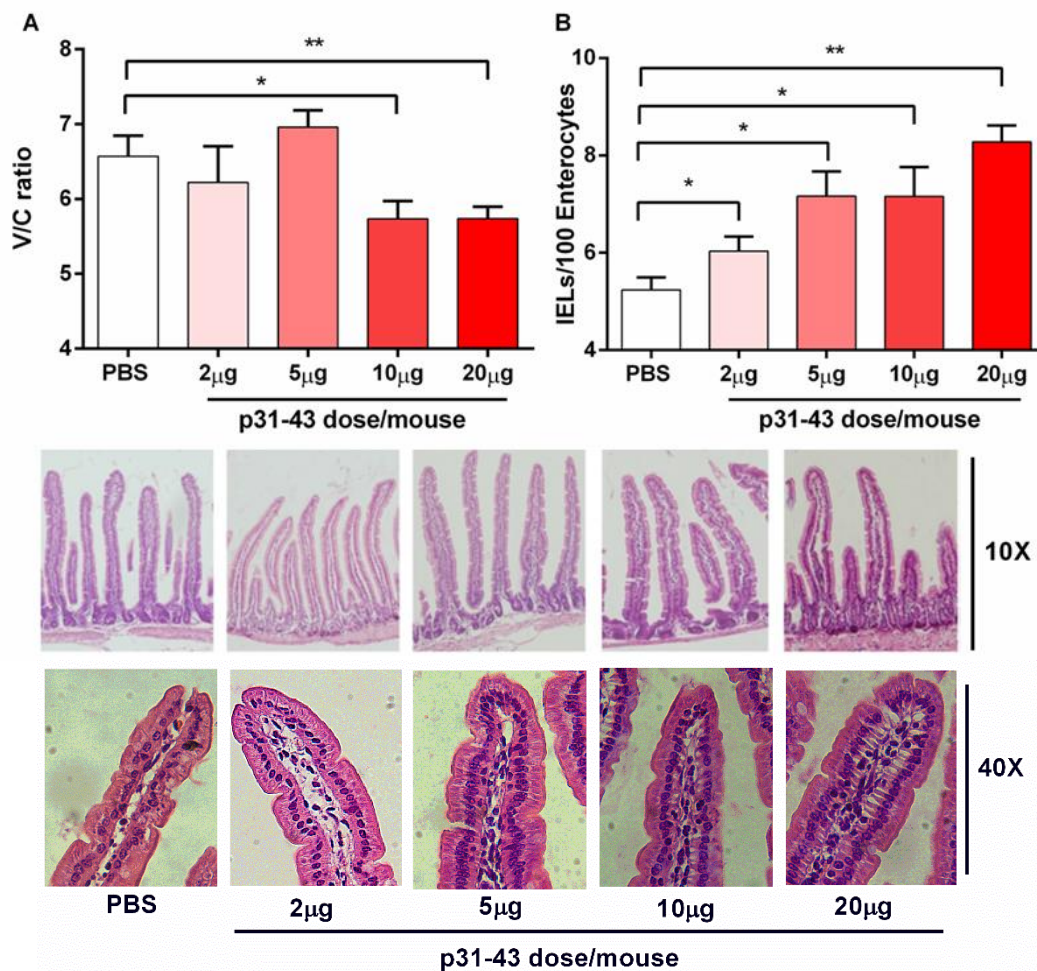

**Supplementary Figure 1. Dose dependent induction of enteropathy by feeding p31-43.** C57BL/6 mice received 2, 5, 10 or 20µg p31-43 or PBS by oral gavage and enteropathy was assessed 16hr later by counting the number of intraepithelial lymphocytes/100 enterocytes (A) and by measuring the ratio between villus length and crypt depth (V/C) (B) in H&E stained sections of paraffin-embedded proximal small intestine. Results shown are means  $\pm$  1 SEM for 5 mice/group. \* $p < 0.05$ , ANOVA. (C) Representative H&E stained sections.

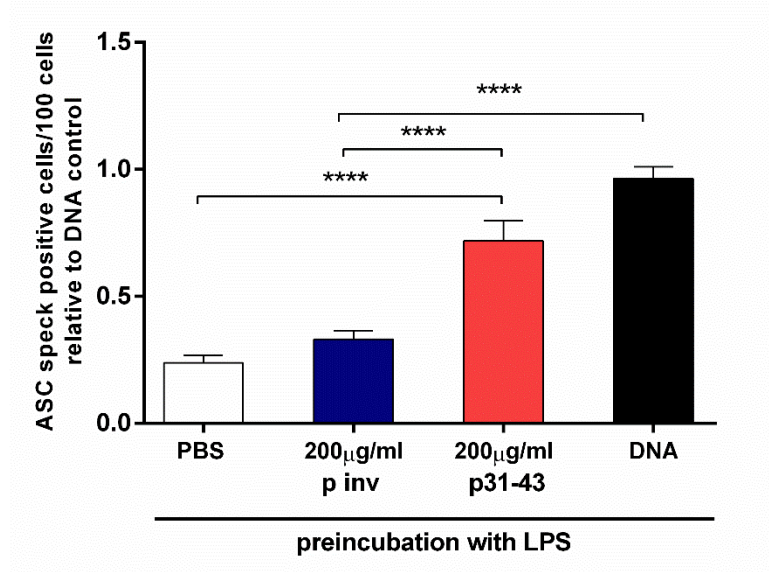

**Supplementary Figure 2. ASC speck formation is not induced by inverted peptide.** Human THP-1 ASC speck reporter cells were preconditioned for 3h with LPS before addition of 200μg/ml p31-43 or inverted peptide for a further 16h. Positive control cells (DNA) were transfected transiently with bacterial plasmid before addition of LPS. Cells showing ASC specks were assessed by immunofluorescence and expressed as positive cells/100 total cells. Results shown are means  $\pm$  1 SEM for three replicates/group. \*\*\*\*p<0.0001, ANOVA.

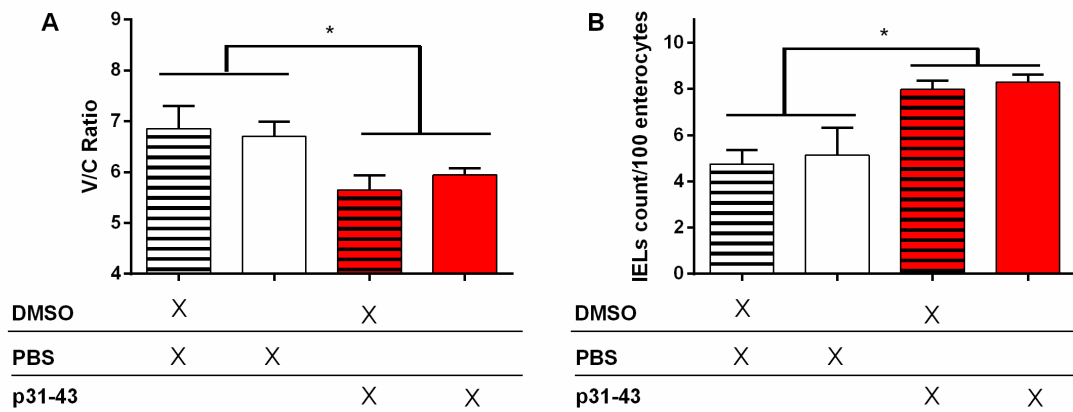

**Supplementary Figure 3. Enteropathy induced by p31-43 is not prevented by DMSO.** Villus/crypt ratios (A) and intraepithelial lymphocyte counts (B) in the proximal small intestine of C57BL/6 mice fed 20μg p31-43 or PBS that had been treated i.p. 30 minutes earlier with DMSO. Results shown are means  $\pm$  1 SEM for 5 mice/group assessed 16hr after feeding p31-43. \*p<0.05, ANOVA.
